# Supplementary material for: Characterization of Acinetobacter baumannii Isolated from Raw Milk
Source: MDPI journal article supplement (doi:10.3390/biology11121845), 2022-12-18
Supplement: s1 [file s1]

Suplemantry Tabel S1:Primers sequence

| gene                                | Primer sequence(5' → 3')                          | Amplicon | References |
|-------------------------------------|---------------------------------------------------|----------|------------|
| <i>rpoB</i> gene                    | Ac696F TAYCGYAAAGAYTTGAAAGAAG                     | 397      | [26]       |
|                                     | Ac1093R CMACACCYTTGTTMCCRTGA                      |          |            |
|                                     | Ac1055F GTGATAARATGGCBGGTCGT                      |          |            |
|                                     | Ac1598R CGBGCRTGCATYTTGTCRT                       | 544      |            |
| <i>16S-23S rRNA</i>                 | A15 FAGTCGTAACAAGGTAGCCG                          | 695      | [27]       |
|                                     | B15 RC T/C A/G T/C TGCCAAGGCAT CCACC              |          |            |
| <i>gyr B</i>                        | sp4FGTTCCTGATCCGAAATTCTCG                         | 490      | [28]       |
|                                     | sp4RAACGGAGCTTGTTCAGGGTTA                         |          |            |
|                                     | sp4F CACGCCGTAAGAGTGCATTA                         | 294      |            |
|                                     | sp4R AACGGAGCTTGTTCAGGGTTA                        |          |            |
| <i>bla<sub>OXA-51</sub>- like</i>   | TAATGCTTTGATCGGCCTTG<br>TGGATTGCACTTCATCTTGG      | 353      | [66]       |
| <i>bla<sub>OXA-23</sub>- like -</i> | GATCGGATTGGAGAACCAGA<br>ATTTCTGACCGCATTTCAT       | 501      |            |
| <i>bla<sub>OXA-58</sub>- like</i>   | AAGTATTGGGGCTTGTGCTG<br>CCCCTCTGCGCTCTACATAC      | 599      |            |
| <i>bla<sub>IMP</sub></i>            | TCGTTTGAAGAAGTTAACGG<br>ATGTAAGTTTCAAGAGTGATGC    | 568      |            |
| <i>bla<sub>VIM</sub></i>            | GGTGTGTTGGTCGCATATCGCAA<br>ATTCAGCCAGATCGGCATCGGC | 502      | [62]       |
| <i>bla<sub>NDM</sub></i>            | GGTTTGGCGATCTGGTTTTC 624<br>CGGAATGGCTCATCACGATC  | 624      |            |

**Supplementary Table S2:** Biochemical profile of *Acintobacter* spp.

|    | Gram stain | catalase | oxidase | Nitrate | hemolysis | TSI | citrate | Arginine hydrolysis | VP       | Urease   | Galactose | Lactose | Mannitol | Sucrose | glucose |
|----|------------|----------|---------|---------|-----------|-----|---------|---------------------|----------|----------|-----------|---------|----------|---------|---------|
| 1  | Gram -ve   | +ve      | -ve     | -ve     | -ve       | k\k | +ve     | +ve                 | -ve      | -ve      | +ve       | -ve     | -ve      | -ve     | +ve     |
| 2  | Gram -ve   | +ve      | -ve     | -ve     | -ve       | k\k | +ve     | +ve                 | -ve      | -ve      | +ve       | -ve     | -ve      | -ve     | +ve     |
| 3  | Gram -ve   | +ve      | -ve     | -ve     | -ve       | k\k | +ve     | w+ve                | <b>V</b> | -ve      | +ve       | -ve     | -ve      | -ve     | +ve     |
| 4  | Gram -ve   | +ve      | -ve     | -ve     | -ve       | k\k | W +ve   | +ve                 | <b>V</b> | -ve      | +ve       | -ve     | -ve      | -ve     | +ve     |
| 5  | Gram -ve   | +ve      | -ve     | -ve     | -ve       | k\k | +ve     | +ve                 | -ve      | -ve      | +ve       | -ve     | -ve      | -ve     | W +ve   |
| 6  | Gram -ve   | +ve      | -ve     | -ve     | -ve       | k\k | +ve     | +ve                 | -ve      | -ve      | +ve       | -ve     | -ve      | -ve     | +ve     |
| 7  | Gram -ve   | +ve      | -ve     | -ve     | -ve       | k\k | +ve     | +ve                 | -ve      | -ve      | <b>V</b>  | +ve     | -ve      | -ve     | +ve     |
| 8  | Gram -ve   | +ve      | -ve     | -ve     | -ve       | k\k | +ve     | W +ve               | -ve      | <b>V</b> | +ve       | -ve     | -ve      | -ve     | +ve     |
| 9  | Gram -ve   | +ve      | -ve     | -ve     | -ve       | k\k | W +ve   | +ve                 | -ve      | <b>V</b> | +ve       | -ve     | -ve      | -ve     | W +ve   |
| 10 | Gram -ve   | +ve      | -ve     | -ve     | -ve       | k\k | W+ve    | +ve                 | -ve      | <b>V</b> | +ve       | -ve     | -ve      | -ve     | -ve     |
| 11 | Gram -ve   | +ve      | -ve     | -ve     | -ve       | k\k | W+ve    | +ve                 | -ve      | <b>V</b> | +ve       | -ve     | -ve      | -ve     | +ve     |
| 12 | Gram -ve   | +ve      | -ve     | -ve     | -ve       | k\k | +ve     | +ve                 | -ve      | -ve      | <b>V</b>  | -ve     | -ve      | -ve     | -ve     |

|    |      |     |     |     |     |     |     |     |     |     |     |     |     |     |     |
|----|------|-----|-----|-----|-----|-----|-----|-----|-----|-----|-----|-----|-----|-----|-----|
| 13 | Gram | +ve | -ve | -ve | -ve | k\k | +ve | +ve | -ve | -ve | +ve | -ve | -ve | -ve | +ve |
|    | -ve  |     |     |     |     |     |     |     |     |     |     |     |     |     |     |

N.B. V:variable , W:weak, K/K: alkalien butt\alkalien slant,-VE :negative, +ve:postive

**Supplementary Table S3:** Results of biofilm formation by microtiter plate (OD600)

| Isolates No.                                                            | Mean± ST                 | Biofilm degree        |
|-------------------------------------------------------------------------|--------------------------|-----------------------|
| <b>Negative control</b><br>(Brain heart infusion broth only)            | 0.09231±0.004934258      | Non-producing biofilm |
| <i>A.baumannii</i> (1)                                                  | 0.359666667±0.039150521  | Moderate              |
| <i>A.baumannii</i> (2)                                                  | 1.817233333± 0.037313045 | Strong                |
| <i>A.baumannii</i> (3)                                                  | 0.1502± 0.01091192       | Weak                  |
| <i>A.baumannii</i> (4)                                                  | 0.093936667± 0.003447903 | Non-producing biofilm |
| <i>A.baumannii</i> (5)                                                  | 0.089866667±0.018681899  | Non-producing biofilm |
| <i>A.baumannii</i> (6)                                                  | 0.155733333±0.027713595  | Weak                  |
| <i>A.baumannii</i> (7)                                                  | 0.181463333± 0.003430894 | Moderate              |
| <i>A.baumannii</i> (8)                                                  | 0.187333333± 0.003000556 | Moderate              |
| <i>A.baumannii</i> (9)                                                  | 0.091823333± 0.001825824 | Non-producing biofilm |
| <b>Positive control</b><br>P. aeruginosa ATCC 27853<br>reference strain | 1.253066667± 0.061481894 | Strong                |
